# Supplementary material
Source: publisher figshare collection journal article supplement (https://sage.figshare.com/ndownloader/files/23184230)
Supplement: Supplementary file [file 23184230]

## Supplementary material

**Supplementary table I.** List of the 17 included conditions and ICD-10 codes.

|                                                                             | ICD-10 code                   |
|-----------------------------------------------------------------------------|-------------------------------|
| <b>CCI conditions included</b>                                              |                               |
| Solid tumor, non-metastatic                                                 | C00–76                        |
| Solid tumor, metastatic                                                     | C77–79                        |
| Leukemia/myeloma                                                            | C88–96                        |
| Lymphoma                                                                    | C81–86                        |
| Chronic liver disease                                                       | B18, K70, K72, K73, K74       |
| Chronic kidney failure                                                      | N18                           |
| COPD                                                                        | J44                           |
| Rheumatoid arthritis                                                        | M04, M05                      |
| Peripheral vascular disease                                                 | I73                           |
| Congestive heart failure                                                    | I50                           |
| Myocardial infarction                                                       | I21, I22                      |
| Diabetes                                                                    | Data obtained from Riksstroke |
| Dementia                                                                    | F00–03                        |
| Previous stroke                                                             | Data obtained from Riksstroke |
| <b>CCI conditions not included</b>                                          |                               |
| Ulcer disease                                                               | -                             |
| Hemiplegia                                                                  | -                             |
| AIDS                                                                        | -                             |
| <b>Non-CCI conditions included</b>                                          |                               |
| Atrial fibrillation/flutter                                                 | Data obtained from Riksstroke |
| Angina pectoris                                                             | I20                           |
| Hypertension                                                                | Data obtained from Riksstroke |
| CCI=Charlson comorbidity index, COPD=chronic obstructive pulmonary disease. |                               |

**Supplementary table II.** Primary diagnosis of each readmission, presented as diagnostic groups.

|                                                       | n=30 287           |
|-------------------------------------------------------|--------------------|
| <b>Infectious</b>                                     | <b>3414 (11.3)</b> |
| Intestinal                                            | 237 (0.8)          |
| Sepsis                                                | 345 (1.1)          |
| Skin infection, erysipelas and mycosis                | 264 (0.9)          |
| Acute upper respiratory and influenza                 | 213 (0.7)          |
| Pneumonia and acute bronchitis                        | 1609 (5.3)         |
| Cystitis and pyelonephritis                           | 326 (1.1)          |
| Miscellaneous                                         | 420 (1.4)          |
| <b>Neoplasm</b>                                       | <b>1647 (5.4)</b>  |
| Malignant solid neoplasm                              | 1201 (4.0)         |
| Leukemia/lymphoma                                     | 313 (1.0)          |
| Benign neoplasm                                       | 133 (0.4)          |
| <b>Endocrine/nutritional and metabolic</b>            | <b>695 (2.3)</b>   |
| Diabetes mellitus                                     | 361 (1.2)          |
| Nutritional/metabolic disease                         | 272 (0.9)          |
| Miscellaneous                                         | 62 (0.2)           |
| <b>Mental and behavioral disorders</b>                | <b>757 (2.5)</b>   |
| Mood disorders                                        | 160 (0.5)          |
| Mental and behavioral disorders due to use of alcohol | 192 (0.6)          |
| Miscellaneous                                         | 405 (1.3)          |
| <b>Nervous system other than stroke</b>               | <b>3309 (7.6)</b>  |
| Dementia                                              | 179 (0.6)          |
| Epilepsy                                              | 670 (2.2)          |
| TIA and related syndromes                             | 600 (2.0)          |
| Paresis                                               | 82 (0.3)           |
| Sequelae of CVD                                       | 473 (1.6)          |
| Miscellaneous                                         | 305 (1.0)          |
| <b>Stroke</b>                                         | <b>2392 (7.9)</b>  |
| Stroke: ICH                                           | 288 (0.9)          |
| Stroke: IS                                            | 2104 (6.9)         |
| <b>Diseases of the eye</b>                            | <b>105 (0.3)</b>   |
| <b>Diseases of the ear</b>                            | <b>125 (0.4)</b>   |
| <b>Circulatory</b>                                    | <b>5007 (16.5)</b> |
| Ischemic heart disease                                | 1196 (3.9)         |
| Atrial fibrillation and other arrhythmias             | 923 (3.0)          |
| Heart failure                                         | 1242 (4.1)         |
| PE/Venous thrombosis                                  | 186 (0.6)          |
| PVD                                                   | 561 (1.9)          |
| Hypertension                                          | 147 (0.5)          |
| Hypotension                                           | 183 (0.6)          |
| Miscellaneous                                         | 569 (1.9)          |
| <b>Gastrointestinal</b>                               | <b>1922 (6.3)</b>  |
| Peptic ulcer                                          | 131 (0.4)          |
| Non infective enteritis and colitis                   | 451 (1.5)          |

|                                                                           |                    |
|---------------------------------------------------------------------------|--------------------|
| Hernia                                                                    | 133 (0.4)          |
| Paralytic Ileus                                                           | 146 (0.4)          |
| Gallbladder and biliary tract                                             | 354 (1.2)          |
| GI bleed                                                                  | 306 (1.0)          |
| Miscellaneous                                                             | 401 (1.3)          |
| <b>Skin other than infection</b>                                          | <b>135 (0.4)</b>   |
| <b>Respiratory</b>                                                        | <b>970 (3.2)</b>   |
| COPD, emphysema and chronic bronchitis                                    | 459 (1.5)          |
| Respiratory insufficiency                                                 | 88 (0.3)           |
| Miscellaneous                                                             | 423 (1.4)          |
| <b>Musculoskeletal</b>                                                    | <b>1208 (3.9)</b>  |
| Rheumatoid arthritis                                                      | 41 (0.1)           |
| Osteoarthritis                                                            | 229 (0.8)          |
| Back pain (dorsalis)                                                      | 135 (0.4)          |
| Spondylopathies                                                           | 219 (0.7)          |
| Miscellaneous                                                             | 584 (1.9)          |
| <b>Genitourinary</b>                                                      | <b>1525 (5.0)</b>  |
| Urolithiasis                                                              | 104 (0.3)          |
| Chronic kidney failure                                                    | 226 (0.7)          |
| Acute kidney failure                                                      | 79 (0.3)           |
| Miscellaneous                                                             | 1116 (3.7)         |
| <b>Congenital malformations</b>                                           | <b>28 (0.1)</b>    |
| <b>Symptoms and findings not elsewhere specified</b>                      | <b>4182 (13.8)</b> |
| Pain in throat and chest                                                  | 658 (2.2)          |
| Abdominal and pelvic pain                                                 | 298 (1.0)          |
| Nausea and vomiting                                                       | 78 (0.3)           |
| Hematuria                                                                 | 166 (0.5)          |
| Dysphagia                                                                 | 57 (0.2)           |
| Vertigo                                                                   | 497 (1.6)          |
| Headache                                                                  | 109 (0.4)          |
| Malaise and fatigue                                                       | 164 (0.5)          |
| Syncope                                                                   | 379 (1.2)          |
| Convulsions                                                               | 221 (0.7)          |
| Anemia                                                                    | 368 (1.2)          |
| Miscellaneous                                                             | 1187 (3.9)         |
| <b>Injury of external cause (Trauma)</b>                                  | <b>2390 (7.9)</b>  |
| Hip fracture                                                              | 846 (2.8)          |
| Other fracture                                                            | 630 (2.1)          |
| Other injury                                                              | 731 (2.4)          |
| Miscellaneous                                                             | 183 (0.6)          |
| <b>Complication medical of surgical care</b>                              | <b>452 (1.5)</b>   |
| <b>Factors influencing health status and contact with health services</b> | <b>1011 (3.3)</b>  |

From day 22 to 1825 (five years) after index stroke.

Presented as No. (%).

COPD=chronic obstructive pulmonary disease,

CVD=cerebrovascular disease, ICH=intracerebral hemorrhage,

IS=ischemic stroke, PVD=peripheral vascular disease, TIA=transient ischemic attack

**Supplementary table III.** Proportions of patients readmitted or deceased at different time points after index stroke.

|           | Admitted    |             |             | Not admitted |             |             | Readmitted or dead |
|-----------|-------------|-------------|-------------|--------------|-------------|-------------|--------------------|
|           | Total       | Alive       | Dead        | Total        | Alive       | Dead        |                    |
| 6 months  | 3031 (30.0) | 2562 (25.4) | 469 (4.6)   | 7061 (70.0)  | 6447 (63.9) | 614 (6.1)   | 3645 (36.1)        |
| 12 months | 4411 (43.7) | 3491 (34.6) | 920 (9.1)   | 5681 (56.3)  | 4959 (49.1) | 722 (7.2)   | 5133 (50.9)        |
| 3 years   | 6569 (65.1) | 4232 (41.9) | 2337 (23.2) | 3523 (34.9)  | 2571 (25.5) | 952 (9.4)   | 7521 (74.5)        |
| 5 years   | 7464 (74.0) | 3907 (38.7) | 3557 (35.2) | 2628 (26.0)  | 1567 (15.5) | 1061 (10.5) | 8525 (84.5)        |

n=10 092. Presented as no. (%).
